# Supplementary material for: Pressure-Dependent Confinement Effect of Ionic Liquids in Porous Silica
Source: Nanomaterials (Basel). 2019 Apr 16;9(4):620. doi: 10.3390/nano9040620 (PMC6523140; doi:10.3390/nano9040620)
Supplement: Supplementary file 1 [file nanomaterials-09-00620-s001.pdf]

## Supplementary Materials: Pressure-Dependent Confinement Effect of Ionic Liquids in Porous Silica

Teng-Hui Wang, En-Yu Lin and Hai-Chou Chang

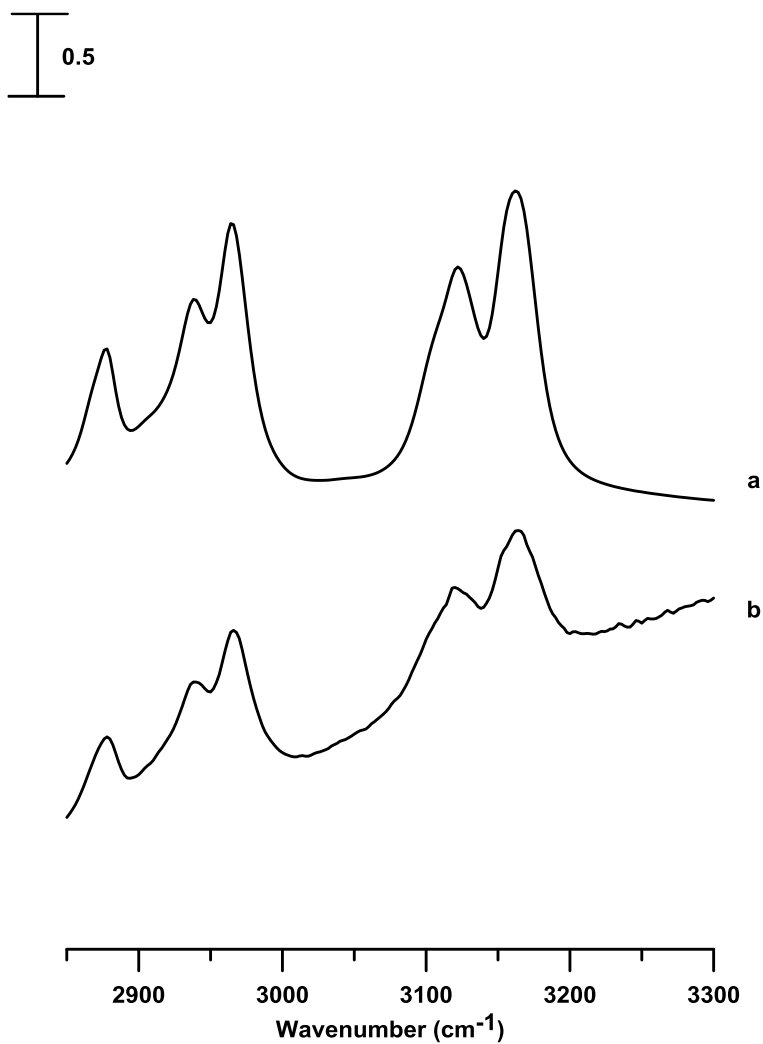

**Figure S1.** Infrared spectra of (a) pure [C4C1Im][BF4] and (b) [C4C1Im][BF4] in a silica matrix, recorded at ambient pressure.

**Commented [M1]:** We did a layout for the supplementary according to our rules, please confirm

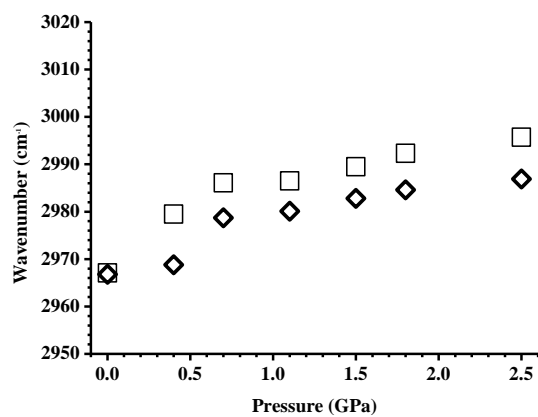

**Figure S2.** Pressure dependence of the C–H stretching frequencies at 2967 cm<sup>-1</sup> of the pure [C4C1Im][BF4] (squares) and [C4C1Im][BF4] in a silica matrix (diamonds).

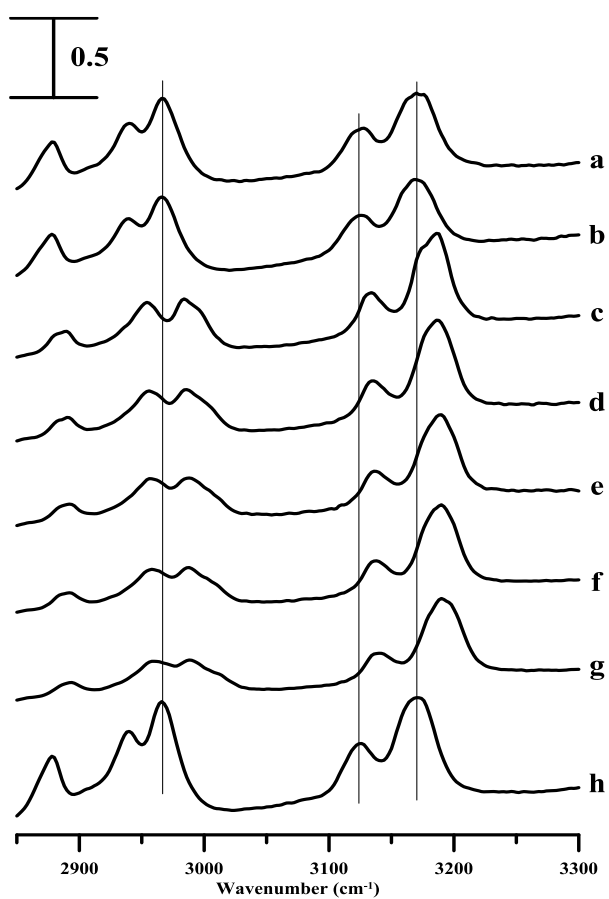

**Figure S3.** Infrared spectra of the pure [C4C1Im][PF6] obtained at (a) ambient pressure and at (b) 0.4, (c) 0.7, (d) 1.1, (e) 1.5, (f) 1.8, (g) 2.5 GPa, and (h) back to ambient.

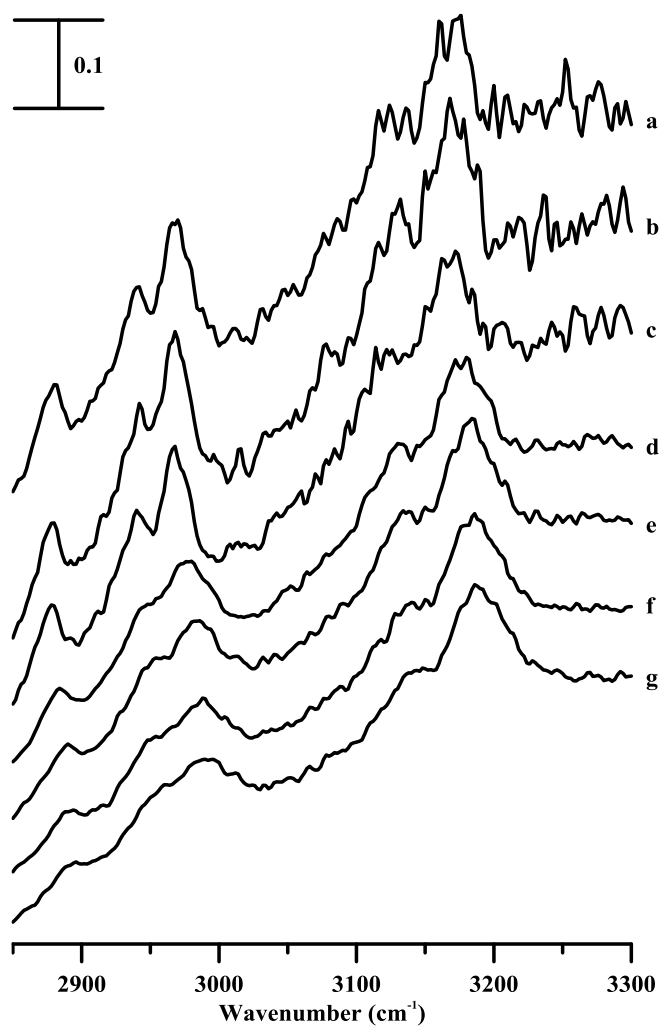

**Figure S4.** Infrared spectra of [C4C1Im][PF6] in a silica matrix obtained at (a) ambient pressure and at (b) 0.4, (c) 0.7, (d) 1.1, (e) 1.5, (f) 1.8, and (g) 2.5 GPa

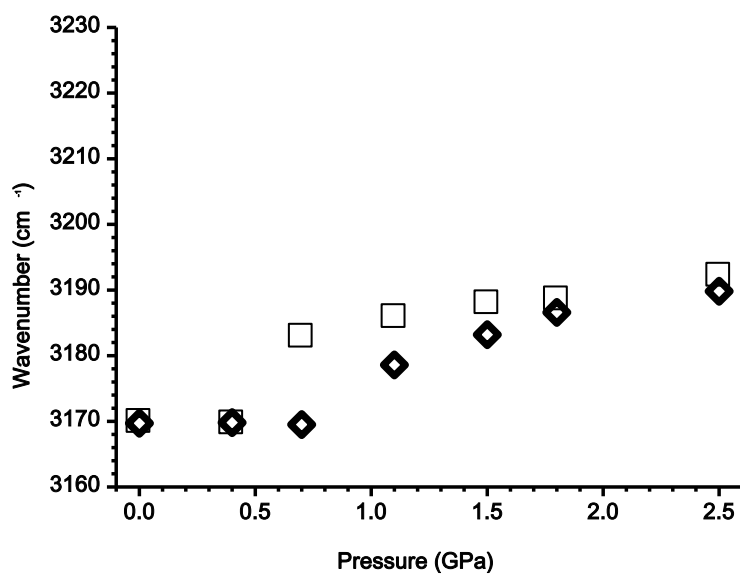

**Figure S5.** Pressure dependence of the C-H stretching frequencies at  $3170\text{ cm}^{-1}$  of the pure  $[\text{C4C1Im}][\text{PF6}]$  (squares) and  $[\text{C4C1Im}][\text{PF6}]$  in a silica matrix (diamonds).
